# Supplementary material for: Genetic Association Study and Machine Learning to Investigate Differences in Platelet Reactivity in Patients with Acute Ischemic Stroke Treated with Aspirin
Source: MDPI journal article supplement (doi:10.3390/biomedicines10102564), 2022-10-13
Supplement: s1 [file s1]

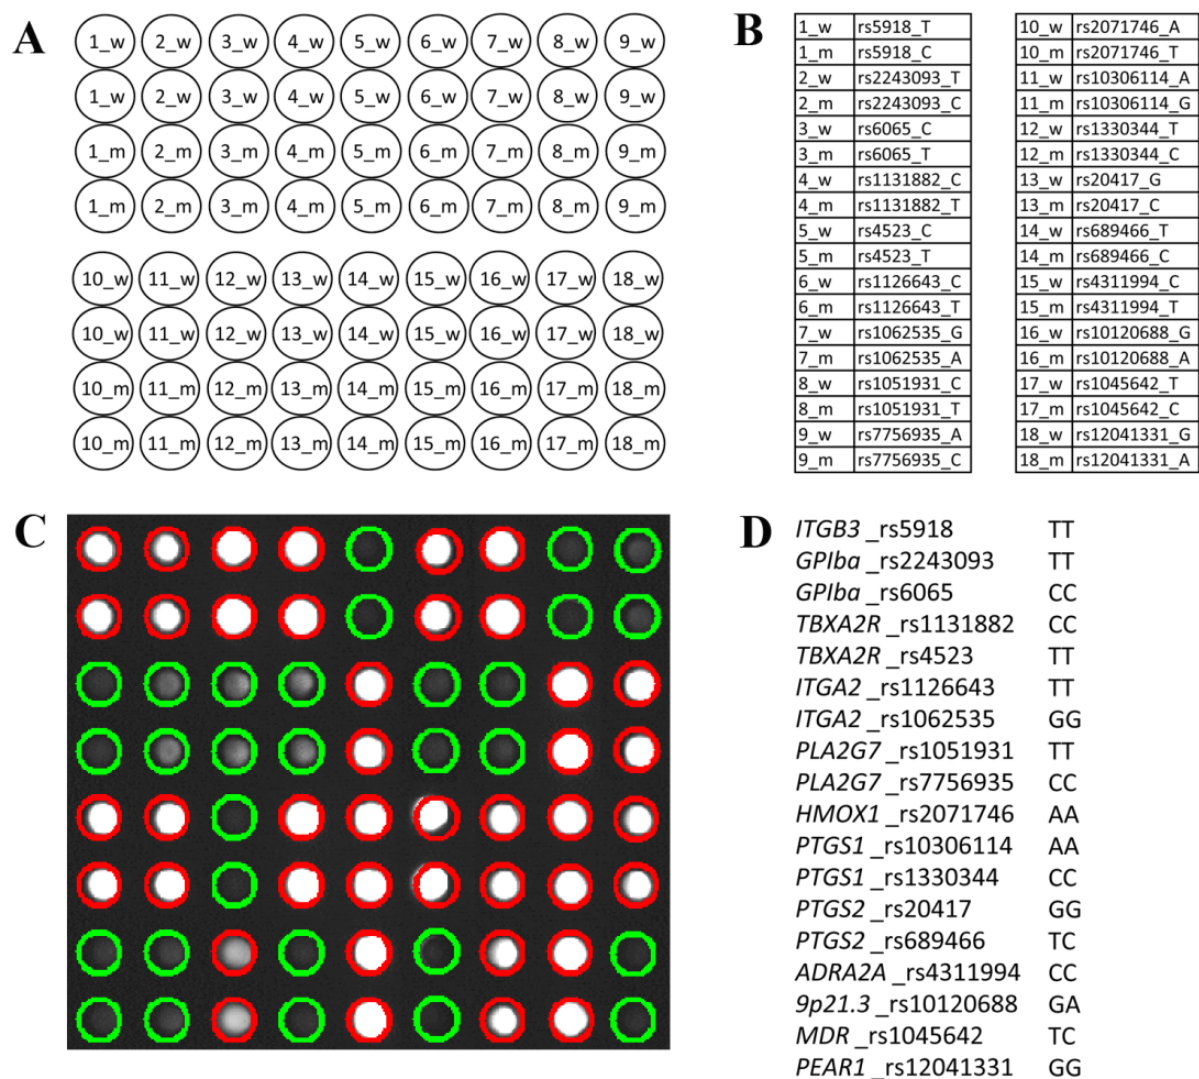

**Figure S2.** The biochip scheme and an example of analysis. A - the biochip scheme, B - symbols of oligonucleotide probes in biochip cells, C - an example of analysis, D – determined genotypes
