# Supplementary figures and images for: Genetic Association Study and Machine Learning to Investigate Differences in Platelet Reactivity in Patients with Acute Ischemic Stroke Treated with Aspirin
Source: MDPI journal article supplement (doi:10.3390/biomedicines10102564), 2022-10-13

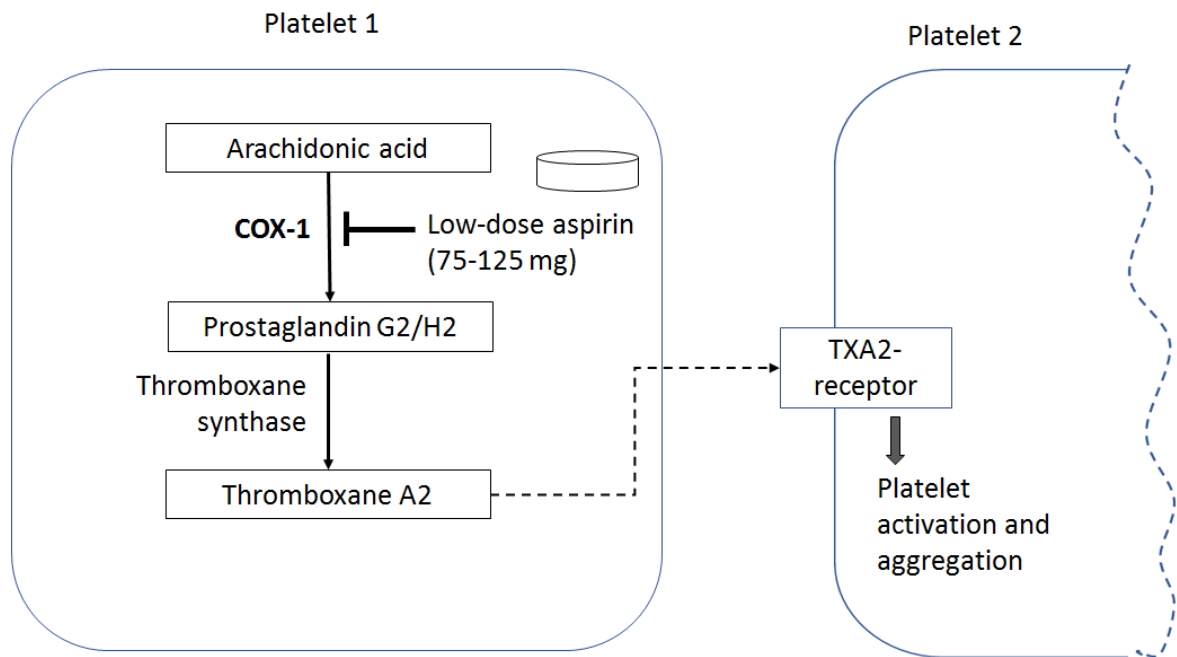

**Figure S1.** The pathway of TXA<sub>2</sub> production and the antiplatelet effect of aspirin

Supplement: s1 [file s1]
